# Supplementary material for: Identification of Pseudomonas fluorescens Chemotaxis Sensory Proteins for Malate, Succinate, and Fumarate, and Their Involvement in Root Colonization
Source: PubMed Central journal article supplement (PMC4262366; doi:10.1264/jsme2.me14128), 2014-12-10
Supplement: 29_413_s1.pdf [file 29_413_s1.pdf]

1 **Table S1** Oligonucleotides used in this study

2

3 Primer name Sequence (5' to 3')

4

5 For construction a plasmid library of 37 putative *mcp* genes.

|    |         |                                   |
|----|---------|-----------------------------------|
| 6  | FLCP01f | ACGTAGAATTCGAATCTGCCAGAAATGCCGTCC |
| 7  | FLCP01r | ACGTAGGATCCGATGGGCAATGTGCTGAAGCTG |
| 8  | FLCP02f | ACGTACTGCAGCCGAGGTGTTTGGTCGTGATAC |
| 9  | FLCP02r | ACGTAGGATCCGTGGCGGTCGAAATAACAGCAG |
| 10 | FLCP03f | AAGTGCTGGACGTGATGAAGAAC           |
| 11 | FLCP03r | ATGAATTCACTGATCCTCGGCCTCGAAC      |
| 12 | FLCP04f | TAGGATCCCAAATACGCACACCACCTCAAG    |
| 13 | FLCP04r | ATACTCGAGCGGAAAGACGGGCACAAAC      |
| 14 | FLCP05f | ATGAATTCGCAGCAGATTGAAATGAAGAAG    |
| 15 | FLCP05r | TAGGATCCCGTGAGCCGTTGGAGAAAC       |
| 16 | FLCP06f | TAGGATCCGCAGCCTGTGTACGAAGAAGTG    |
| 17 | FLCP06r | ATAGTCGACTGATTGTGGTGTCTGGGATTG    |
| 18 | FLCP07f | TAGGATCCTTTCCGGTGGATAGCACAAAC     |
| 19 | FLCP07r | ATGAATTCGCAATAAATTCAGGCGCTTACC    |
| 20 | FLCP08f | ATACTGCAGGGATTGATCGTAGCCGCTTG     |

21 FLCF08r TAGGATCCCAAGGAAACGGGTGAGAAATAGG

22 FLCF09f TAGGATCCGGATTCTGGCGTAGCCGTAG

23 FLCF09r ATGAATTCGCCAGAGGGTCAAAGGAATG

24 FLCF10f ATTAGATCTGGTCCCGAAGGCATCAATAC

25 FLCF10r ATACTCGAGAGCGATCCGTTTCAGTTGCTC

26 FLCF11f TAGGATCCACGCCGAACTCAACAAACC

27 FLCF11r TATAAGCTTATGCGAAACAGCAGAAACAAC

28 FLCF12f TAGGATCCAATCGAAACGCGGAAGAAAC

29 FLCF12r ATGAATTCTCACCCGCCTCACAACAAG

30 FLCF13f ATGAATTCCGGGCGATTCAACAAACTC

31 FLCF13r TAGGATCCACACAAAGCAAGCGCATCAC

32 FLCF14f TAGGATCCTTCTCCTCGGACTTCCTTTCTC

33 FLCF14r ATGAATTCCATTTCCGGCCTGTTCACCTATC

34 FLCF15f ATGAATTCTAGCCACATCTCCCGCATC

35 FLCF15r TAGGATCCACAACAACAAGGAATACCCATGAAC

36 FLCF16f TAGGATCCGCCAGGGAGGAAATGAACAG

37 FLCF16r ATGAATTCACATTCACGATACAAACCGACAAC

38 FLCF17f ATACAGTTTCACCTCGAAGAACC

39 FLCF17r ATGAATTCCAGAGAGCGATGCACAGAGG

40 FLCF18f ATACTGCAGTCAAAGACCCAGAGGAAATCAAG

41 FLCP18r ATTGGATCCGATACAGAAATCAGGCGCACAC  
42 FLCP19f GTGGTTCGAGAGAGACCGATG  
43 FLCP19r ATTGAATTCAAGAACTGGCTGAAGAGATGTGG  
44 FLCP20f ATTGGATCCTGCTGACCTCCCAACTTCATTAG  
45 FLCP20r ATTGAATTCCGCATCGGTGGAAGAAGAG  
46 FLCP21f ACGTAGGATCCTCGAGAGATACGCCGACATGAG  
47 FLCP21r ACGTAGAATTCGCTGCGATGGTCCTTTAACTCC  
48 FLCP22f ATTGAATTCCGCCATAAAGAAAGCCGAAAC  
49 FLCP22r ATTGGATCCTGATTTCCGTCATTCCACAAAC  
50 FLCP23f ATTGAATTGACCGAAGTGTTGCGTGAAG  
51 FLCP23r ATTGGATCCCCCGAGACGATCAACAGAAAC  
52 FLCP24f ATAGGTACCGGCTTTGGCTTTCACCACTC  
53 FLCP24r TATGAGCTCGCTGCGGTGTTTCAGTTGTCC  
54 FLCP25f ATTGGATCCATCAACAGCGTGACCCATCC  
55 FLCP25r AACTGCAGAGGTGAAAGCCCATCAGGAC  
56 FLCP26f TATGGATCCATCAAACCTCTTACGCCGATG  
57 FLCP26r TAACTCGAGCCGAAGGTTGTGTTGAGGTG  
58 FLCP27f ATTGGATCCATCCTGGCTTTCCTGCTTC  
59 FLCP27r ATTGAATTGCGCCACAATTCACGTCTTACC  
60 FLCP28f TAACTCGAGGCGGATTGGTCAGCTCTTG

61 FLCP28r TATGGATCCCGCGCTGTCTATGCTCATTC  
62 FLCP29f ATTGGATCCCGATCTATCTGGCGATTGTG  
63 FLCP29r TAAGTCGACGAGTGCGGCTTGAATGGAC  
64 FLCP30f ACGTAGGATCCAGCTAAAGGTGACAGATGCGAC  
65 FLCP30r ACGTACTGCAGGCGTTGATCTCCCTTGGTTGAC  
66 FLCP31f ATTGGATCCCTATCCCGCCGAAATCAATC  
67 FLCP31r ATTGAATTCCATTCTGCGTTCAAGTTTCC  
68 FLCP32f ATTGAATTCACATTCATATCCACCGACAAACC  
69 FLCP32r ATTGGATCCGAGACGCCACTGCATGTTC  
70 FLCP33f ATTGAATTCTTTAGCAGGGCACCAATCC  
71 FLCP33r ATTGGATCCCGGGTTCCTACAGAATCAGACC  
72 FLCP34f CCTGATGCACGCAAGGAAC  
73 FLCP34r ATAGGATCCCTCCTTCACCTACAACATTGCCTAC  
74 FLCP35f TAACTCGAGCAACCGAAGGAGAATGCAATG  
75 FLCP35r ATTAGATCTGGGTCGTTAGCTCAGTTGGTAGAG  
76 FLCP36f ATTGGATCCGATTCACCCTTGACCCATTC  
77 FLCP36r ATTGAATTCGGCGGGTATTGGTGGTAGAG  
78 FLCP37f ATTGGATCCAAGATGCACATGACCAACACC  
79 FLCP37r ATTGAATTCATCGCTCAAGTATTCGGTTTCAC  
80 For construction of unmarked gene deletion mutants

81 NM09Uf TAAGTCGACGCCGCATCGAATGACAAG  
82 NM09Ur TATGGATCCCGAAAGCCACCACCACAAAC  
83 NM09Df TATGAATTCATGGCGCAGGTATTTGAGCAG  
84 NM09Dr TAACTCGAGCGCAGCCTCATCAGAGGTAAG  
85 NM21Uf ACGTATCTAGAAACGATCACGGGAGTTAAAGGACC  
86 NM21Ur ACGTAGAATTCTTGTGGCGGATATGCCTTGTTTCAG  
87 NM21Df ACGTAAAGCTTGGCACTCACTTCATCTAACGAC  
88 NM21Dr ACGTATCTAGATCTTGCGTCATACATCGACCTG  
89 NMPARUf ATCTTTCTAGATTCCCGTTTCATCGGCAATC  
90 NMPARUr AACCAAGAATTCGCGAATCGCACGCAAGAAC  
91 NMPARDf CCTACAAGCTTGCTTCAAGGCCTGAAACGAAC  
92 NMPARDr CTTGATCTAGACGCCACAGAGCCTTCCTGTC

93

---

94

95

96 **Figure legends**

97

98 **Fig. S1** Growth of *P. fluorescens* Pf0-1 wild-type and mutant in PNS containing

99 glucose (5 g/L). Vertical bars represent the standard errors of measurements done at

100 least two independent experiments conducted in triplicate.

101

102

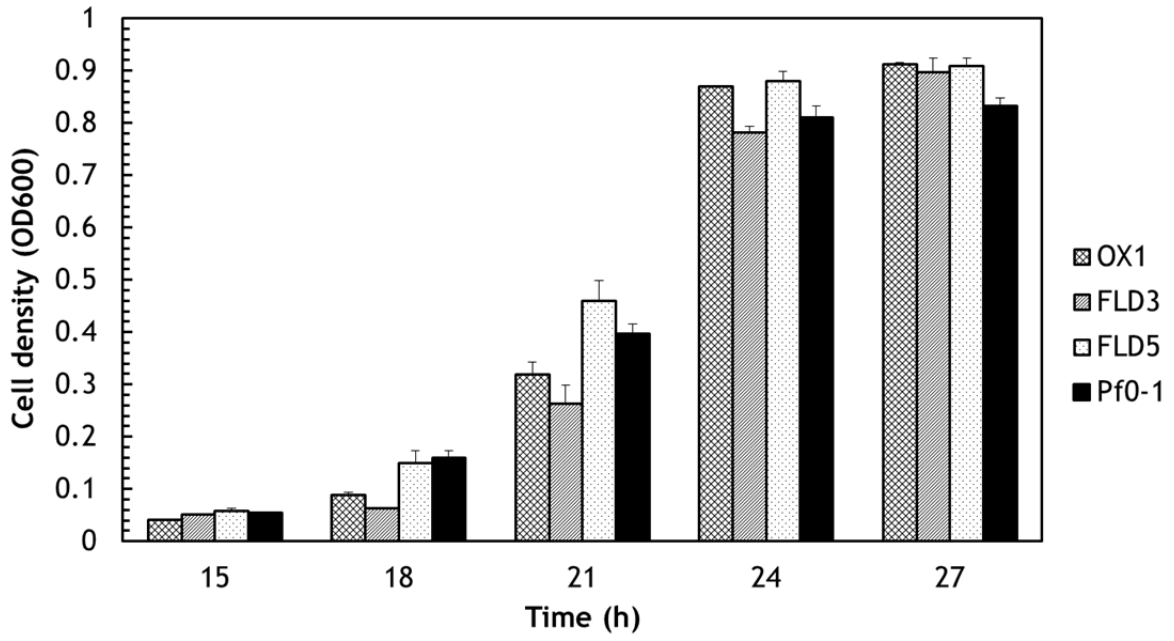

103

104

Fig. S1

105

106

107

108

109

110

111

112
